# Supplementary material for: Translating trait to state assessment: The case of grandiose narcissism
Source: PLOS journal article supplement (doi:10.1371/journal.pone.0284649), 2023-05-01
Supplement: S1 (10.1371/journal.pone.0284649.s001) [file journal.pone.0284649.s001.pdf]

# Appendix

## Partially saturated models

Mplus syntax and output can be found on the Open Science Framework via [this link](#).

**Table A1**

*Within-person results of the partially saturated model including a fully saturated model at the between-person level*

| Adjective                 | Factor loadings |                |             |
|---------------------------|-----------------|----------------|-------------|
|                           | 1 (General)     | 2 (Admiration) | 3 (Rivalry) |
| <u>Within-person</u>      |                 |                |             |
| Glorious <sup>a</sup>     | .33***          | .56***         | -           |
| Envied <sup>a</sup>       | .59***          | .23*           | -           |
| Prestigious <sup>a</sup>  | .44***          | .51***         | -           |
| Brilliant <sup>a</sup>    | .38***          | .61***         | -           |
| Powerful <sup>a</sup>     | .30**           | .61***         | -           |
| Superior <sup>a</sup>     | .32***          | .55***         | -           |
| Contemptuous <sup>b</sup> | .64***          | -              | .21         |
| Irritated <sup>b</sup>    | .34**           | -              | .65***      |
| Gleeful <sup>b</sup>      | .70***          | -              | .05         |
| Envious <sup>b</sup>      | .50***          | -              | .32**       |
| Resentful <sup>b</sup>    | .41***          | -              | .39***      |
| Angry <sup>b</sup>        | .34*            | -              | .92***      |

*Note.*  $\chi^2$  (41) = 63.88, CFI = .99, TLI = .96, RMSEA = .02; SRMR<sub>within</sub> = .05, SRMR<sub>between</sub> = .00, CFI<sub>within</sub> = .99, RMSEA<sub>within</sub> = .03

**Table A2**

*Between-person results of the partially saturated model including a fully saturated model at the within-person level*

| Adjective                 | Factor loadings |                |             |
|---------------------------|-----------------|----------------|-------------|
|                           | 1 (General)     | 2 (Admiration) | 3 (Rivalry) |
| <u>Between-person</u>     |                 |                |             |
| Glorious <sup>a</sup>     | .56***          | .72***         | -           |
| Envied <sup>a</sup>       | .80***          | .30***         | -           |
| Prestigious <sup>a</sup>  | .52***          | .80***         | -           |
| Brilliant <sup>a</sup>    | .50***          | .85***         | -           |
| Powerful <sup>a</sup>     | .51***          | .65***         | -           |
| Superior <sup>a</sup>     | .65***          | .70***         | -           |
| Contemptuous <sup>b</sup> | .95***          | -              | -.07        |
| Irritated <sup>b</sup>    | .79***          | -              | .54***      |
| Gleeful <sup>b</sup>      | .88***          | -              | -.13        |
| Envious <sup>b</sup>      | .76***          | -              | .15         |
| Resentful <sup>b</sup>    | 1.00***         | -              | -.01        |
| Angry <sup>b</sup>        | .75***          | -              | .67***      |

*Note.*  $\chi^2$  (42) = 41.68, CFI = 1.00, TLI = 1.00, RMSEA = .00; SRMR<sub>within</sub> = .00, SRMR<sub>between</sub> = .03, CFI<sub>between</sub> = 1.00, RMSEA<sub>between</sub> = .00
